# Supplementary material
Source: PubMed Central journal article supplement (PMC3091216)
Supplement: supp_M111.225029_jbc.M111.225029-1.pdf [file supp_M111.225029_jbc.M111.225029-1.pdf]

**Fig S1. Mass spectrometry analysis of proMMP-7 demonstrates thiol-alkylation of the cysteine switch domain.** Recombinant proMMP-7 (10  $\mu$ M) was incubated with OA-NO<sub>2</sub> in 50 mM sodium phosphate, 100  $\mu$ M DTPA, pH 7.4 for 30 min at 37 °C. ProMMP-7 was digested with sequencing grade-modified trypsin for 3 or 16h at 37°C. **A**, LC-ESI-MS/MS spectrum of the nitroalkylated cysteine switch domain peptide. **B**, MS-MS fragment ions of OA-NO<sub>2</sub> modified cysteine peptide. Detected ions are highlighted in bold. **C**, Fragmentation of the MMP-7 modified thiol (S-OA-NO<sub>2</sub>) peptide. These results are representative of three independent experiments.

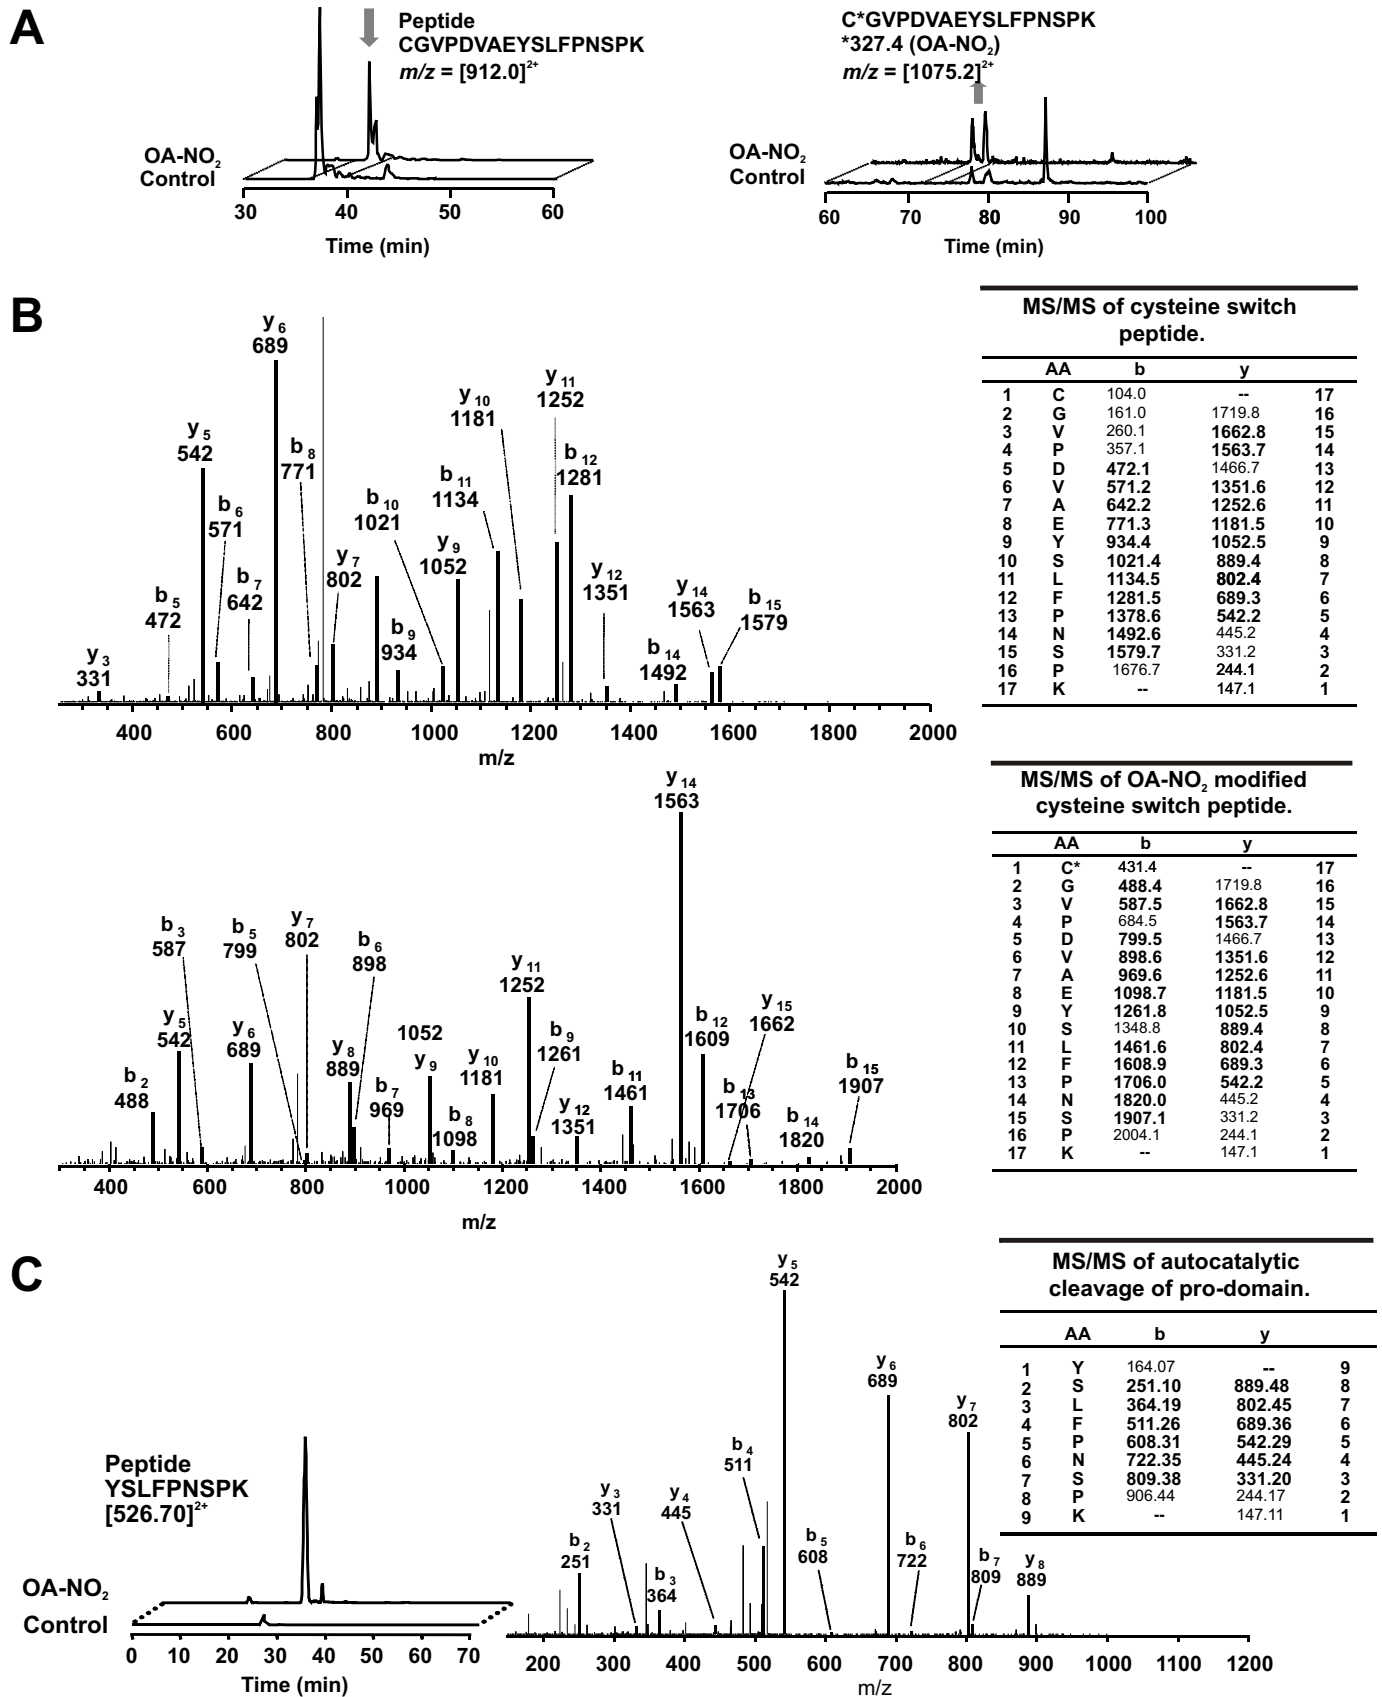

Fig. S1 Bonacci et al
